# Supplementary material
Source: MDPI journal article supplement (https://www.mdpi.com/2075-163X/12/9/1156)
Supplement: s1 [file s1]

# Supplementary Material—On the cobalt content upgrade in nickeliferous laterites using iron (III) sulfate: A study based on thermodynamics simulations

Rodrigo F. M. Souza \*, Mariana A. A. Tavares, Luiz E. C. Cruz, Víctor A. A. Oliveira, Iranildes D. Santos, Francisco J. Moura and Eduardo A. Brocchi

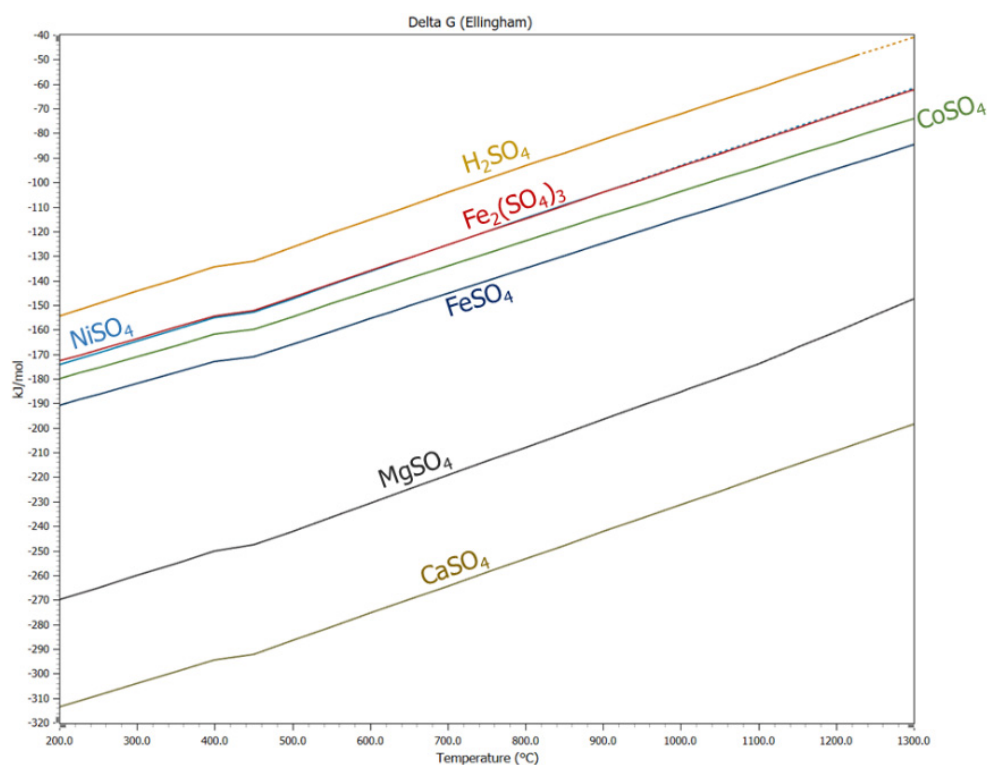

Figure S1. Ellingham diagram for sulfates formation based on a fixed quantity of  $\text{O}_2$ .

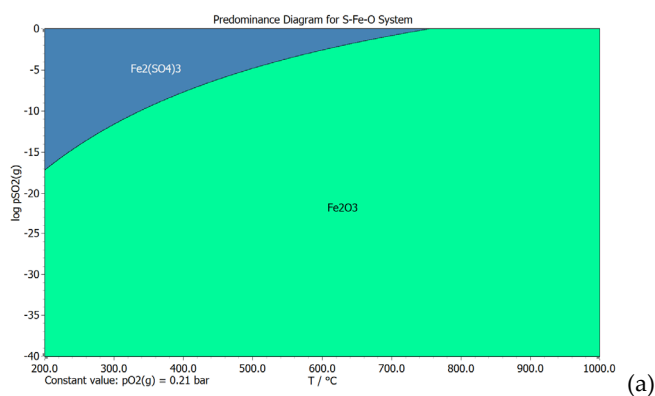

(a)

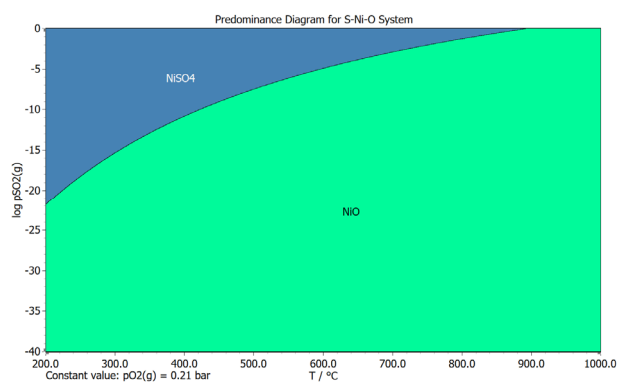

(b)

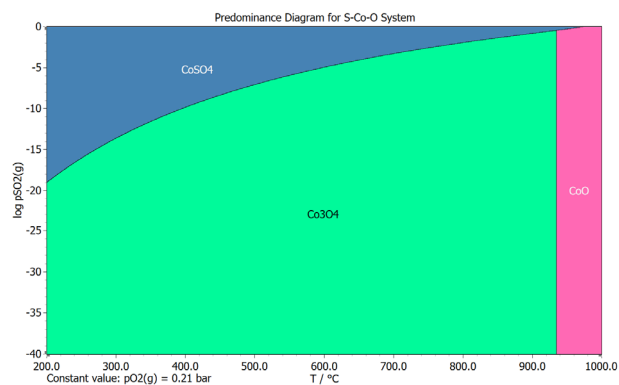

(c)

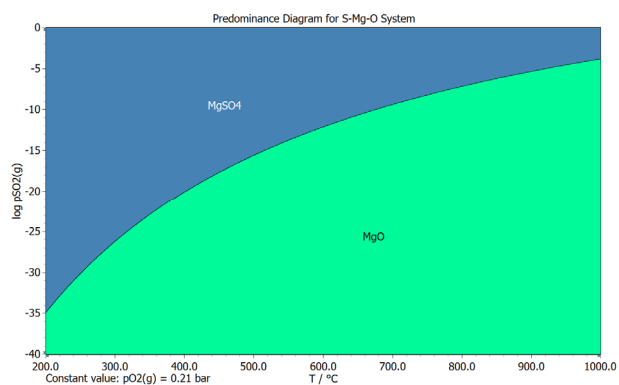

(d)

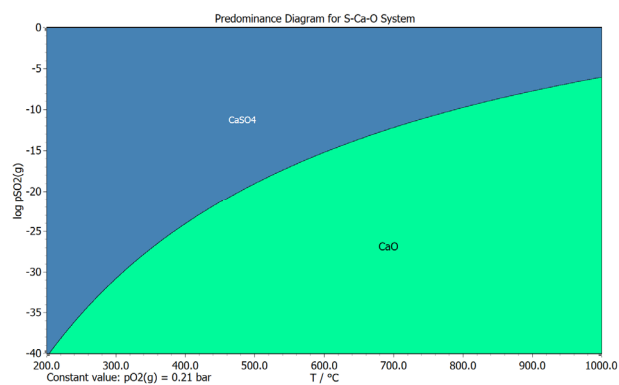

(e)

**Figure S2.** Predominance diagrams as function of temperature for a fixed quantity of oxygen (0.21 bar): (a) S-Fe-O system; (b) S-Ni-O system; (c) S-Co-O system; (d) S-Mg-O system; (e) S-Ca-O system.

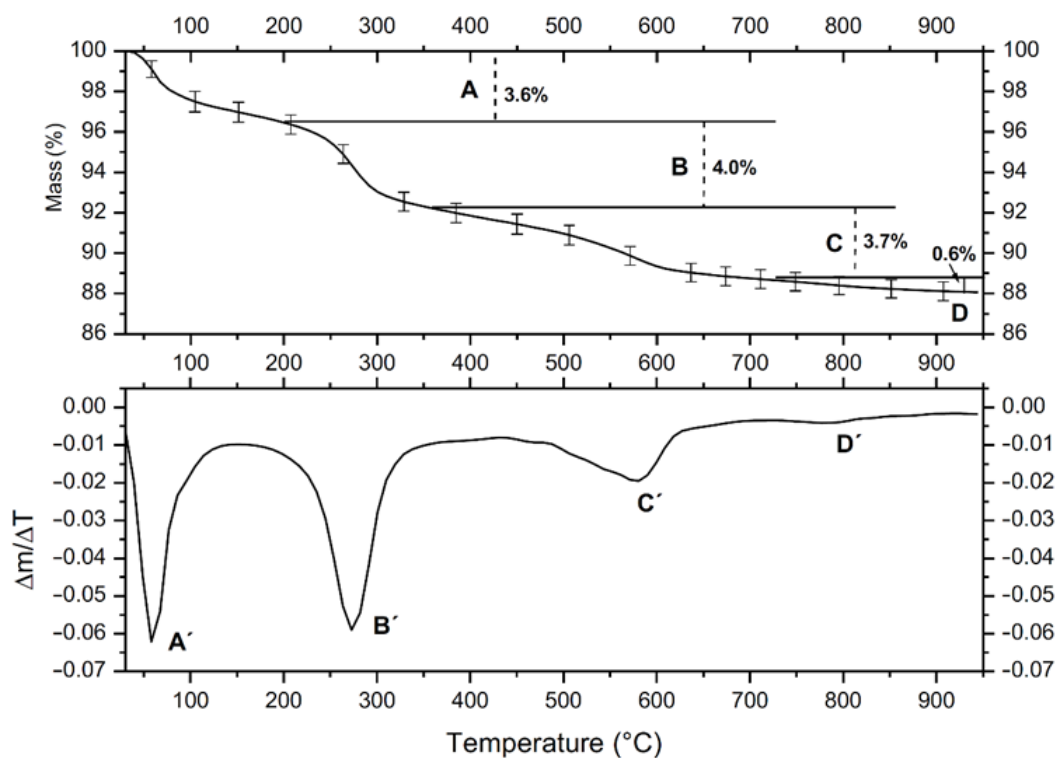

**Figure S3.** TGA and DTG characterization of the sample as received.

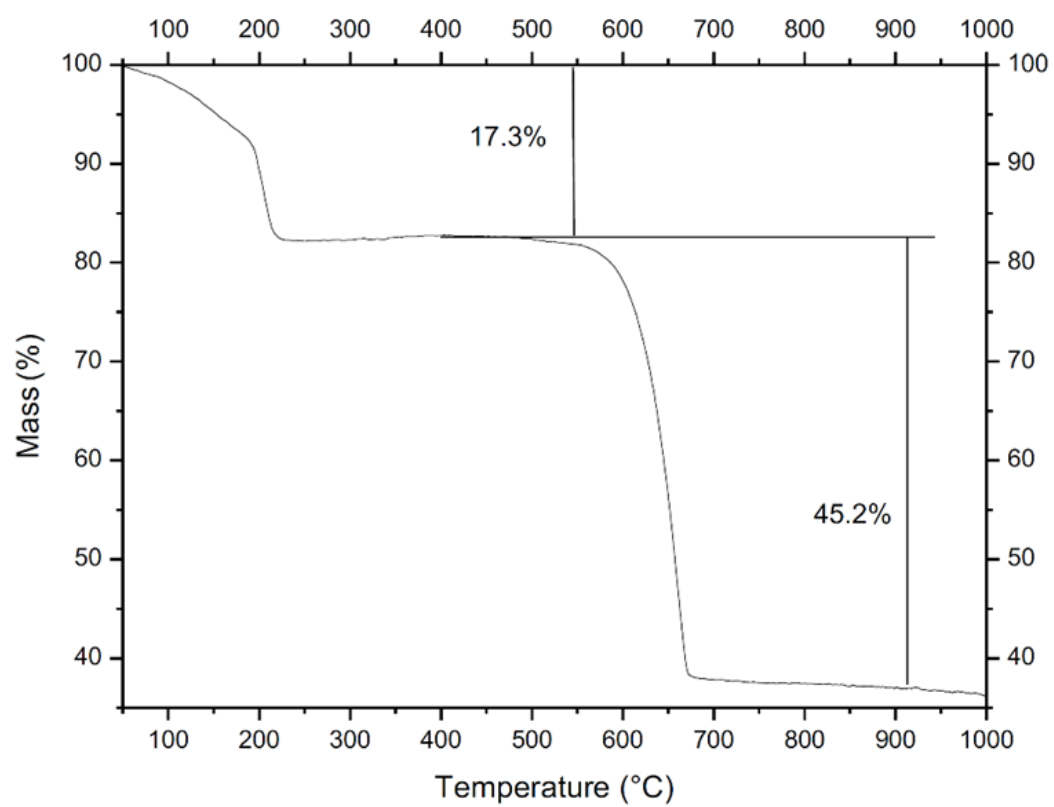

**Figure S4.** TGA characterization of the iron sulfate used as sulfation roasting reagent.
